# Supplementary material
Source: Elsevier journal article supplement (https://www.sciencedirect.com/science/article/pii/S0025775321007211)
Supplement: mmc1 [file S0025775321007211:mmc1.doc]

**Criterios de inclusión y de exclusión:**

Los **criterios de inclusión** fueron todos aquellos pacientes ingresados en la UCI de Anestesia con diagnóstico de insuficiencia respiratoria grave secundaria a neumonía por SARS-CoV-2 confirmada por PCR (faríngea y/o broncoaspirado pulmonar) y que presentaban al menos uno de los siguientes criterios:

-Neumonía diagnosticada por técnicas de imagen, bien por radiografía de tórax (infiltrados bilaterales) o por tomografía computerizada de tórax (afectación en vidrio deslustrado, ya sea de forma aislada o en combinación con consolidaciones pulmonares, como hallazgos más típicos)1

-Ventilación mecánica de más de 2 días de evolución

-Shock séptico, entendido como hipotensión persistente que requiere de vasopresores para mantener una presión arterial media ≥ 65 mm Hg, y cifras de lactato superiores a 2 mmol/L, a pesar de una resucitación adecuada con fluidos2

-Presencia de Síndrome de distrés respiratorio agudo (SDRA) entendido como la expresión de la inflamación a nivel pulmonar en respuesta a una agresión3

Los **criterios de exclusión** fueron:

-Pacientes con enfermedad neurológica o neuromuscular avanzada que provocaban situación de dependencia de manera previa al ingreso.

-Pacientes con situación de dependencia moderada o grave cuantificada con índice de Barthel <55 puntos (Índice de Barthel < 20 puntos: dependencia total. 20-35 puntos: dependencia grave. 40-55 puntos: dependencia moderada. ≥ 60 puntos: dependencia leve. 100 puntos: independencia).

-Descompensación de enfermedad psiquiátrica diagnosticada previamente.

-Pacientes con déficit cognitivo previo, es decir, con deterioro de la capacidad para procesar el pensamiento más allá de lo que podría considerarse consecuencia del envejecimiento normal.

-Pacientes con enfermedades terminales e incurables con expectativa de vida menor de 6-12 meses.

1. R. Sánchez-Oro et al. La radiología en el diagnóstico de la neumonía por SARS-COV-2 (COVID-19) /Med Clin (Barc). 2020; 155(1): 36-40.

2. Singer M, Deutschman CS, Seymour CW, Shankar-Hari M, Annane D, Bauer M, et al. The Third International Consensus Definitions for Sepsis and Septic Shock (Sepsis-3). JAMA. 2016;315:801-10.

3. Force ADT, Ranieri VM, Rubenfeld GD, Thompson BT, Ferguson ND, et al. Acute respiratory distress syndrome: The Berlin definition. JAMA 2012;307:2526-2533.

**EuroQol-5D-3L: medición de la calidad de vida relacionada con la salud**

Badia X, Roset M, Montserrat S, Herdman M, Segura A. La versión española del EuroQol: descripción y aplicaciones. Med Clin (Barc) 1999; 112 (Supl 1): 79-86.

Rabin R, Oemar M, Oppe M. The EQ-5D-3L User Guide. Basic information on how to use the EQ-5D-3L-3L instrument. Rotterdam: EuroQolGroup; 2011. Disponible en: http://www.euroqol.org/fileadmin/user_upload/Documenten/PDF/Folders_Flyers/UserGuide_EQ-5D-3L.pdf

El EQ-5D-3L es un instrumento genérico de medición de la calidad de vida relacionada con la salud (CVRS) que puede utilizarse tanto en individuos relativamente sanos (población general) como en grupos de pacientes con diferentes patologías. El propio individuo valora su estado de salud, primero en niveles de gravedad por dimensiones (sistema descriptivo) y luego en una escala visual analógica (EVA) de evaluación más general. Un tercer elemento del EQ-5D-3L es el índice de valores sociales que se obtiene para cada estado de salud generado por el instrumento. El sistema descriptivo contiene cinco dimensiones de salud (movilidad, cuidado personal, actividades cotidianas, dolor/malestar y ansiedad/depresión) y cada una de ellas tiene tres niveles de gravedad (sin problemas, algunos problemas o problemas moderados y problemas graves). En esta parte del cuestionario el individuo debe marcar el nivel de gravedad correspondiente a su estado de salud en cada una de las dimensiones, refiriéndose al mismo día que cumplimente el cuestionario. En cada dimensión del EQ-5D-3L, los niveles de gravedad se codifican con un 1 si la opción de respuesta es «no (tengo) problemas»; con un 2 si la opción de respuesta es «algunos o moderados problemas»; y con un 3 si la opción de respuesta es «muchos problemas».

La combinación de los valores de todas las dimensiones genera números de 5 dígitos, habiendo 243 combinaciones ­estados de salud­ posibles, que pueden utilizarse como perfiles. Por ejemplo, un individuo que señale que no tiene problemas para caminar (1), no tiene problemas con el cuidado personal (1), tiene algunos problemas para realizar sus actividades cotidianas (2), tiene moderado dolor o malestar (2) y no está ansioso o deprimido (1), se ubica en el estado de salud 11221.

La segunda parte del EQ-5D-3L es una EVA vertical de 20 centímetros, milimetrada, que va desde 0 (peor estado de salud imaginable) a 100 (mejor estado de salud imaginable). En ella, el individuo debe marcar el punto en la línea vertical que mejor refleje la valoración de su estado de salud global en el día de hoy. El uso de la EVA proporciona una puntuación complementaria al sistema descriptivo de la autoevaluación del estado de salud del individuo.


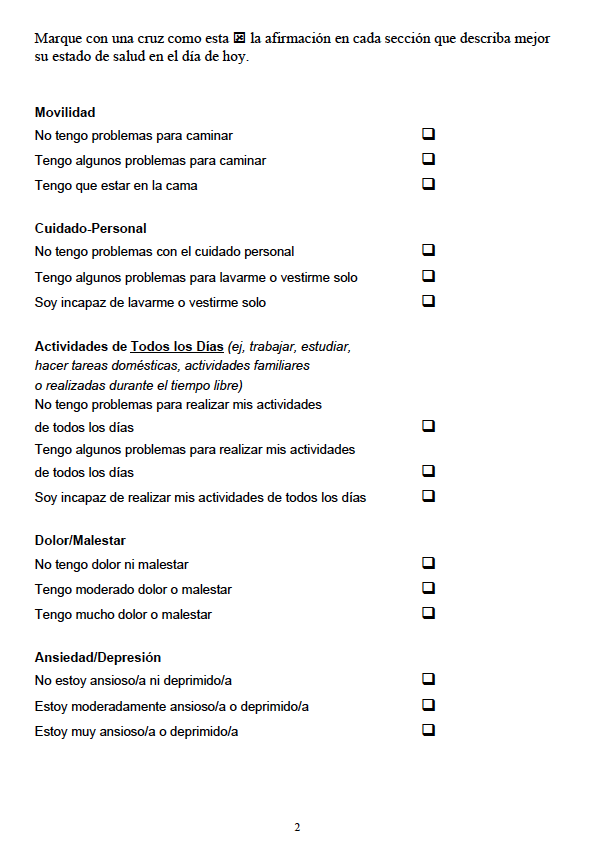


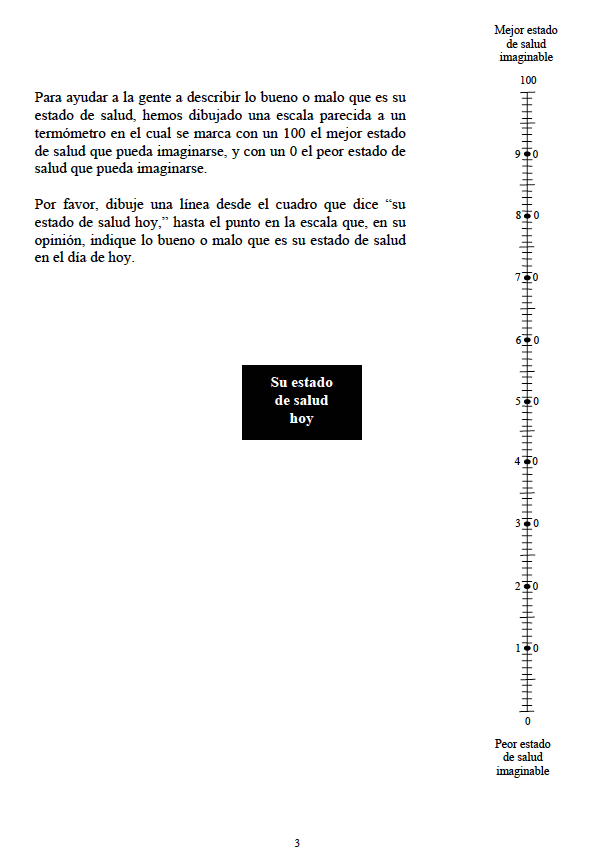


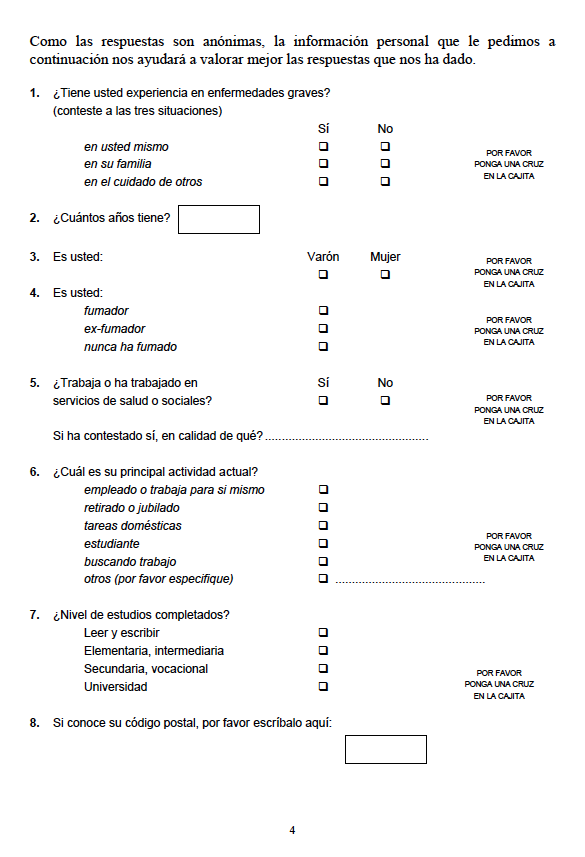


**Prueba de la marcha de los 6 minutos**

ATS Committee on Proficiency Standards for Clinical Pulmonary Function Laboratories. ATS statement:

guidelines for the six-minute walk test. Am J Respir CritCare Med 2002;166(1):111-117.

La prueba de caminata de 6 minutos (PC6M) evalúa de forma integrada la respuesta de los sistemas respiratorio, cardiovascular, metabólico, músculo esquelético y neurosensorial al estrés impuesto por el ejercicio. La integración funcional se analiza mediante la distancia máxima que un individuo puede recorrer durante un período de seis minutos caminando tan rápido como le sea posible. La PC6M

constituye una herramienta confiable en el diagnóstico, estadificación, pronóstico y seguimiento de individuos con enfermedades respiratorias crónicas.

Consiste en medir la máxima distancia que el paciente es capaz de caminar en 6 minutos, en un recorrido corto en un pasillo, evaluando simultáneamente la frecuencia cardíaca, la saturación de oxígeno y el grado de disnea.

La PC6M se lleva a cabo en un corredor con longitud de 30 metros, de superficie plana, preferentemente en interiores y evitando el tránsito de personas ajenas a la prueba. Por lo general las personas sanas pueden caminar entre 400 y 700 metros en 6 minutos, dependiendo de la edad, estatura y sexo.

Limitaciones

Los pacientes con alguna limitación funcional crónica para deambular podrían realizar el examen con los elementos de ayuda que habitualmente usen (bastones, prótesis, etc.). En este caso no se deberá relacionar con los valores teóricos de población sana.

Contraindicaciones

Contraindicaciones absolutas

- Angina inestable en el primer mes de evolución.
- Infarto agudo de miocardio en el primer mes de evolución.
- Imposibilidad para caminar por evento agudo (v. gr. esguince de tobillo, herida en el pie, fractura de pierna, etc.)

Contraindicaciones relativas

- Frecuencia cardíaca > 120 por minuto en reposo.
- Presión arterial sistólica > 180 mmHg.
- Presión arterial diastólica > 100 mmHg.
- Saturación arterial de oxígeno en reposo < 89%.

**Prueba “levanta y anda” (Test get up and go)**

Podsiadlo D, Richardson S. The timed «Up & Go»: a test of basic functional mobility for frail elderly persons. J Am Geriatr Soc. 1991; 39:142-8.

El test de Time Up & Go tiene utilidad clínica como instrumento de cribado de riesgo de caídas, sin aportar información detallada en cuanto al área concreta de la discapacidad que está influyendo directamente sobre el riesgo.

Para realizar la prueba, se medirá el tiempo necesario para levantarse de la silla (preferiblemente sin utilizar los brazos), caminar hasta la marca situada a 3 m, (ambos pies deben rebasar la marca), darse la vuelta y sentarse nuevamente en la silla.

El tiempo se comienza a medir cuando el evaluador dice la orden acordada. El cronómetro se detiene cuando el paciente se sienta.

El paciente empleará su producto de apoyo habitual (bastón, andador…) y caminará a paso lo más rápido posible (sin correr), caminando a un paso ligero pero seguro. Se anotarán observaciones como el producto de apoyo utilizado y otras que puedan resultar útiles.

Puntuación:

Menos de 10 segundos: bajo riesgo de caída.

Entre 10 y 20 segundos: indica fragilidad (riesgo de caída).

Más de 20 segundos: Elevado riesgo de caída.


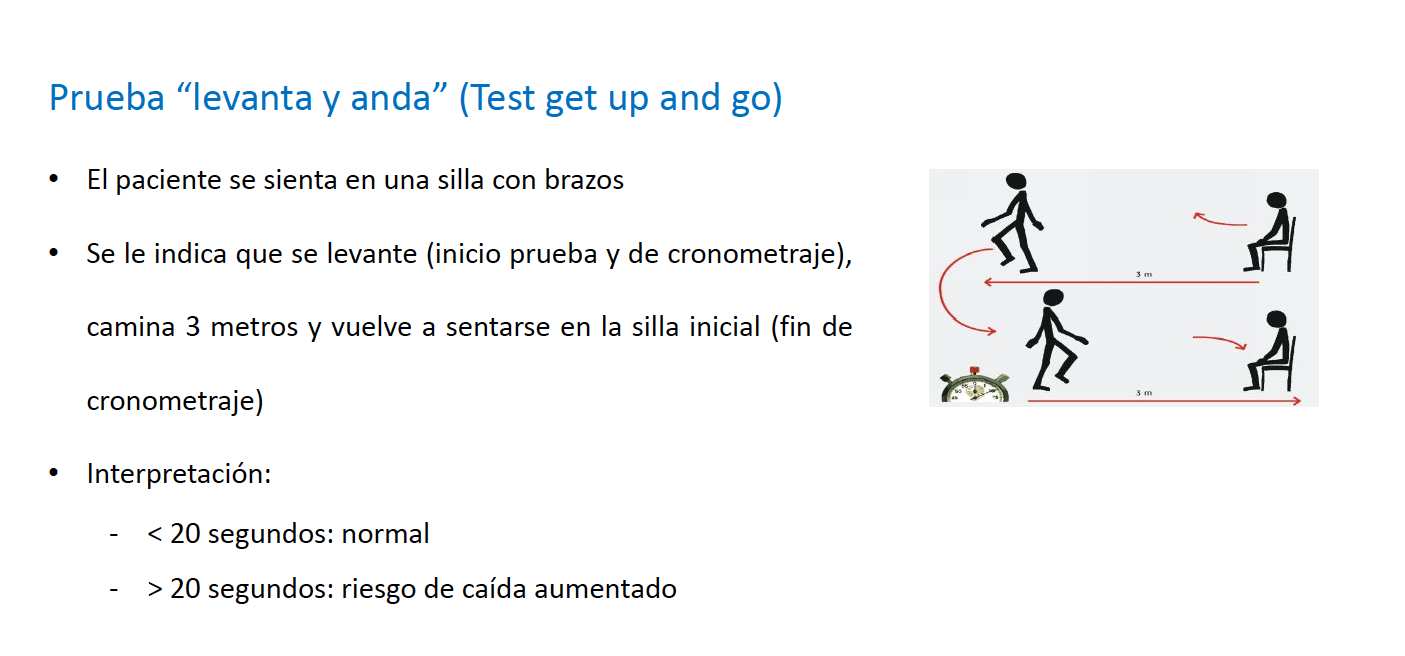


**Medición de la fuerza muscular a través del dinamómetro manual digital**

Instrumento utilizado para medir la fuerza de agarre en mano. La medición se realiza utilizando la mano no dominante y la no dominante y registrando la mayor de tres mediciones, esperando un intervalo de 60 segundos para evitar la fatiga muscular. El individuo debe estar en posición de pie, hombro aducido y neutralmente rotado, codo en 90º, muñeca en posición neutral y manilla tomada con garra cilíndrica con el reloj del instrumento mirando al evaluador. Se explica al sujeto que debe realizar la empuñadura con la máxima fuerza posible mediante un impulso rápido pero continuado, hasta alcanzar la máxima potencia

El valor de la dinamometría manual digital es en % de normalidad. La medición se realiza en newtons de la fuerza media de las máximas realizadas de empuñamiento. Mediante una base de datos estratificada por edad y sexo, se establece el porcentaje respecto a la normalidad.

Se considera normal >90%, entre 80 y 90% levemente alterado, <80% notablemente alterado.

NedMano / IBV® (València, España) del Instituto de biomecánica de València- Universitat Politécnica de València es un software para la valoración funcional de la mano durante distintos gestos (en este estudio: empuñamiento). Compara los resultados que se obtienen con una base de datos referida a la población española segmentada por edad, género y dominancia. Registra directamente las siguientes variables biomecánicas: Fuerza máxima en los gestos de empuñamiento.

Parámetros que valora:

Valora la mano dominante, la contralateral y la relación entre ambas.

Estas valoraciones se basan en la comparación entre la mano afecta y la sana (si la hay), y con la base de datos de normalidad. Valora parámetros relativos a la fuerza máxima de la mano: Contracción Voluntaria Máxima, Fuerza Media, Coeficiente de Variación e Índices de Pérdida de Fuerza (contra-lateral y respecto a la normalidad).

**Evaluación Cognitiva Montreal - Montreal Cognitive Assessment (MoCA)**

Nasreddine Z, Phillips N, Bdirian, V., Charbonneau, S., Whitehead, V., Collin, I., et al. (2005). The montreal cognitive assessment, MoCA: A brief Screening tool for mild cognitive impairment. Journal of the American Geriatrics Society, 53(4), 695-699.

El instrumento de evaluación cognitiva de Montreal, se diseñó para la detección de transtorno neurocognitivo leve y estadios tempranos de demencia. Evalúa los siguientes dominios cognitivos: atención y concentración; funciones ejecutivas, memoria, lenguaje, habilidades visoespaciales, razonamiento conceptual, cálculo y orientación. Tiene varias versiones alternas con la intención de disminuir los posibles efectos de aprendizaje cuando se utiliza de manera repetida en la misma persona. MoCA© ha sido probado en 14 idiomas y en personas de edades entre 49 y más de 85 años y con diversos grados de escolaridad.

El tiempo de administración requerido es de aproximadamente diez minutos. El puntaje máximo es de 30; un puntaje igual o superior a 26 se considera normal. Las puntuaciones se obtienen sumando todos los puntos obtenidos en el margen derecho de la hoja, con un máximo de 30 puntos. Se añade un punto si el sujeto tiene 12 años o menos de estudios (si el MoCA es inferior a 30).


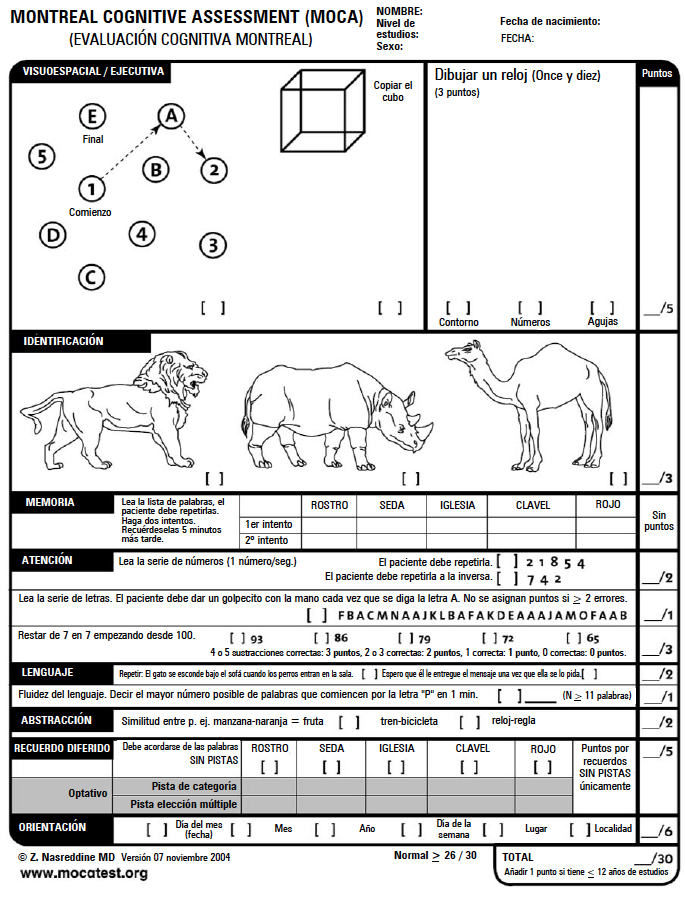


**Escala HADS (Hospital Anxiety and Depression Scale) - Escala Hospitalaria de Ansiedad y Depresión**

Zigmond AS, Snaith RP. The hospital anxiety and depression scale. Acta Psychiatr Scand. 1983 Jun;67(6):361-70. doi: 10.1111/j.1600-0447.1983.tb09716.x. PMID: 6880820.

El HADS es un instrumento utilizado ampliamente para evaluar síntomas de ansiedad y depresión en el ámbito hospitalario.

Fue creada por Zigmund y Snaith (1983) para la evaluación de los síntomas cognitivos y conductuales y no así los síntomas somáticos de la ansiedad y la depresión como insomnio, fatiga, pérdida y/o aumento de peso y/o apetito.

Ha sido aplicada en pacientes que acuden con regularidad a ambientes hospitalarios, no psiquiátricos, con lo cual resulta una mejor herramienta para la detección de distrés psicológico en población médicamente enferma (en comparación con el resto de escalas de autoaplicación en el área) y evitar equívocos de atribución cuando se aplica a individuos con algún tipo de enfermedad.

Se ha aplicado a pacientes con diversas enfermedades crónicas, principalmente cáncer y diabetes.

La escala HADS ha sido adaptada y validada en España por Tejero, Guimera, Farré y Peri en 1986.

**Escala Hospitalaria de Ansiedad y Depresión (HADS)**

Los médicos conocen la importancia de los factores emocionales en la mayoría de enfermedades. Si el médico sabe cuál es el estado emocional del paciente puede prestarle entonces mejor ayuda.

Este cuestionario ha sido confeccionado para ayudar a que su médico sepa cómo se siente usted afectiva y emocionalmente. Lea cada pregunta y subraye la respuesta que usted considere que coincide con su propio estado emocional en la última semana.

No es necesario que piense mucho tiempo cada respuesta; en este cuestionario las respuestas espontáneas tienen más valor que las que se piensan mucho

**A.1. Me siento tenso/a o nervioso/a:**

3. Casi todo el día 2. Gran parte del día 1. De vez en cuando 0. Nunca

**D.1. Sigo disfrutando de las cosas como siempre:**

0. Ciertamente, igual que antes 1. No tanto como antes 2. Solamente un poco 3. Ya no disfruto con nada

**A.2. Siento una especie de temor como si algo malo fuera a suceder:**

3. Sí, y muy intenso 2. Sí, pero no muy intenso 1. Sí, pero no me preocupa 0. No siento nada de eso

**D.2. Soy capaz de reírme y ver el lado gracioso de las cosas**

0. Igual que siempre 1. Actualmente, algo menos 2. Actualmente,mucho menos 3. Actualmente, en absoluto

**A.3. Tengo la cabeza llena de preocupaciones:**

3. Casi todo el día 2. Gran parte del día 1. De vez en cuando 0. Nunca

**D.3. Me siento alegre:**

3. Nunca 2. Muy pocas veces 1. En algunas ocasiones 0. Gran parte del día

**A.4. Soy capaz de permanecer sentado/a tranquilo/a y relajado/a:**

0. Siempre 1. A menudo 2. Raras veces 3. Nunca

**D.4. Me siento lento/a y torpe:**

3. Gran parte del día 2. A menudo 1. A veces 0. Nunca

**A.5. Experimento una desagradable sensación de «nervios y hormigueos» en el estómago:**

0. Nunca 1. Sólo en algunas ocasiones 2. A menudo 3. Muy a menudo

**D.5. He perdido el interés por mi aspecto personal:**

3. Completamente 2. No me cuido como debería hacerlo 1. Es posible que no me cuide como debiera 0. Me cuido como siempre lo he hecho

**A.6. Me siento inquieto/a como si no pudiera parar de moverme:**

3. Realmente mucho 2. Bastante 1. No mucho 0. En absoluto

**D.6. Espero las cosas con ilusión:**

0. Como siempre 1. Algo menos que antes 2. Mucho menos que antes 3. En absoluto

**A.7. Experimento de repente sensaciones de gran angustia o temor:**

3. Muy a menudo 2. Con cierta frecuencia 1. Raramente 0. Nunca

**D.7. Soy capaz de disfrutar con un buen libro o con un buen programa de radio o televisión:**

0. A menudo 1. Algunas veces 2. Pocas veces 3. Casi nunca

Puntos de corte: Menor de 8 : sin enfermedad, 8-10 : dudoso, Mayor de 10 : caso

**Escala para la evaluación del trastorno por Estrés Post-Traumático. Davidson Trauma Scale.**

Davidson JR, Tharwani HM, Connor KM. Davidson Trauma Scale (DTS): normative scores in the general population and effect sizes in placebo-controlled SSRI trials. Depress Anxiety. 2002;15(2):75-8. doi: 10.1002/da.10021. PMID: 11891997.

La escala de Trauma de Davidson (DTS) mide la frecuencia y gravedad del Estrés Postraumático.

Fue diseñada para valorar la frecuencia y severidad de los síntomas del trastorno por estrés postraumático en sujetos que han sufrido un evento estresante. Sus ítems se basan en los criterios DSM-IV (criterio B ítems 1-4 y 17, criterio C ítems 5-11 y criterio D ítems 12-16). Consta de 17 ítems, los referentes a intrusión y evitación hacen referencia al acontecimiento estresante, mientras que los de embotamiento, aislamiento e hiperactivación sólo valoran la presencia o ausencia de los mismos. Cada ítem se evalúa mediante una doble escala: una de frecuencia y otra de gravedad. La escala de frecuencia ofrece cinco posibles respuestas (nunca, a veces, 2-3 veces, 4-6 veces, a diario) que puntúan de 0 a 4. La escala de gravedad presenta también cinco posibles respuestas (nada, leve, moderada, marcada, extrema), que se puntúan de igual forma que la escala anterior. Se pueden obtener tres resultados distintos: la puntuación total que corresponde a la suma de todos los ítems y la puntuación de las escalas de frecuencia y gravedad que corresponden a la suma de las respuestas de cada subescala. La escala es autoadministrada y el marco de referencia es la semana anterior.

Su utilidad reside en la valoración de la gravedad y frecuencia de síntomas de trastorno por estrés postraumático y en la valoración de la respuesta al tratamiento, ya que se ha mostrado sensible al cambio a lo largo del tiempo.

El rango de las subescalas de severidad y gravedad es de 0 a 68 puntos y el del total de la escala de 0 a 136. A mayor puntuación mayor severidad y/o frecuencia. Los autores proponen como punto de corte más eficiente los 40 puntos, que muestran una sensibilidad del 69%, una especificidad del 95%, un valor predicitivo positivo del 92% y un valor predictivo negativo del 83%.


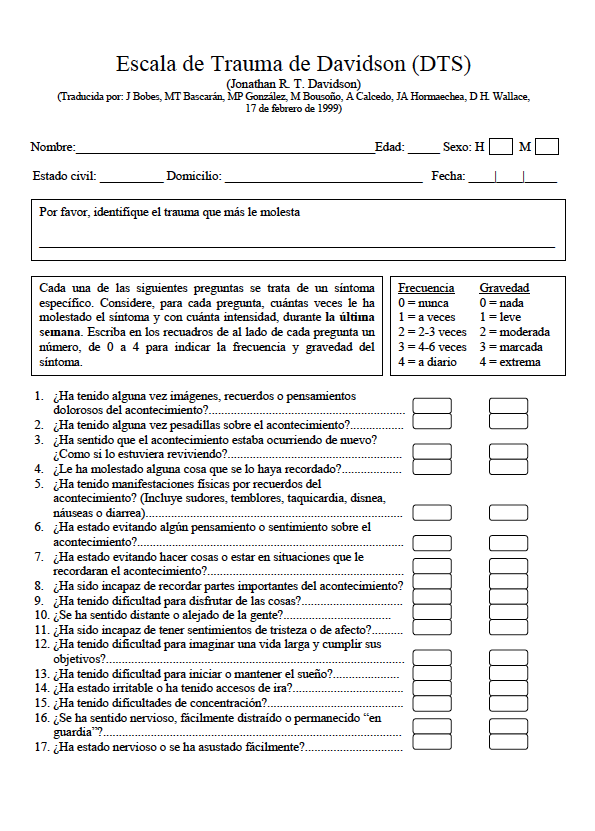


**‘Malnutrition Universal Screening Tool’ (‘MUST’: ‘Instrumento universal para el cribado de la malnutrición’) para adultos**

[http://www.bapen.org.uk/screening-for-malnutrition/must/must-toolkit/the-must-itself/must-espanol](http://www.bapen.org.uk/screening-for-malnutrition/must/must-toolkit/the-must-itself/must-espanol" \t "_blank)

La herramienta Malnutrition Universal Screening Tool (MUST), recomendada por ESPEN (European Society for Clinical Nutrition and Metabolism) en el contexto comunitario comunitario y por la BAPEN (British Association of Parenteral and Enteral Nutrition) tanto en hospitales como comunitario. Es un sistema de detección de la desnutrición con una alta fiabilidad inter-observador que ha sido validado frente a varias herramientas y a evaluaciones completas llevadas a cabo por un dietista. Las 3 categorías en las que clasifica a los pacientes son riesgo bajo, medio y alto, y están basadas en la pérdida de peso involuntaria, el IMC y la gravedad de la enfermedad. Se completa con un plan de intervención nutricional. Puede ser aplicado a todos los pacientes adultos en cualquier nivel de asistencial. Se revisa anualmente.

Es un instrumento de cribado de cinco pasos, diseñado para identificar a adultos malnutridos, con riesgo de malnutrición (desnutrición) u obesos. Incluye además unas directrices de tratamiento que pueden emplearse para desarrollar un plan de cuidados. Está pensado para usarse en hospitales, ambulatorios y otros medios de atención sanitaria y puede ser utilizado por todos los profesionales sanitarios.

El procedimiento consta de cinco pasos:

Pasos 1 y 2 – Obtenga las medidas nutricionales (estatura, peso, IMC, pérdida de peso involuntaria reciente). Cuando no sea posible obtener la estatura ni el peso, utilice las medidas alternativas

Paso 3 – Valore el efecto de las enfermedades agudas.

Paso 4 – Determine la puntuación de riesgo total o la categoría de malnutrición. Cuando no sea posible establecer el IMC ni la pérdida de peso, evalúe subjetivamente el riesgo global empleando ‘Otros criterios’

Paso 5 – Con ayuda de las directrices de tratamiento o las normas locales, elabore un plan de cuidados adecuado.

**VSG (Valoración Subjetiva Global-VSG) Subjective Global Assessment Form (SGA)**

Detsky AS, McLaughlin JR, Baker JP, Johnston N, Whittaker S, Mendelson RA, Jeejeebhoy KN. What is subjective global assessment of nutritional status? JPEN J Parenter Enteral Nutr. 1987 Jan-Feb;11(1):8-13. doi: 10.1177/014860718701100108. PMID: 3820522.

Subjective Global Assessment (SGA) o en español Valoración Subjetiva Global (VSG) es una herramienta de valoración nutricional creada en 1982 y ampliamente usada, con el objetivo de identificar pacientes desnutridos y predecir morbilidad en pacientes quirúrgicos, aunque posteriormente ha sido aplicada en muchas otras poblaciones. Está basada en la historia clínica y un examen físico del paciente y es usada frecuentemente para predecir resultados de salud relacionados con la morbilidad y la duración de la hospitalización.

Valora la pérdida de peso, cambios en la ingesta oral, síntomas gastrointestinales y capacidad funcional. También incluye una exploración física en la que se examina la pérdida de masa muscular y de masa grasa, edema maleolar y sacro, y ascitis. Finalmente, se clasifica a los pacientes en 3 categorías según el predominio de síntomas: bien nutrido (A), sospecha de desnutrición o desnutrición moderada (B) (pérdida de peso del 5-10%, reducción de la ingesta en las últimas semanas y pérdida de tejido subcutáneo) y desnutrición grave (C) (pérdida depeso > 10%, grave pérdida de masa muscular y tejido subcutáneo o presencia de edemas).

Al ser una valoración subjetiva requiere ser realizado por personal experimentado, pero su aprendizaje es fácil y requiere poco tiempo para su realización. Es el método de cribado recomendado por la American Society for Parenteral and Enteral Nutrition (ASPEN) en sus guías del 2002.

**Escala Visual Analógica**

Vicente Herrero MT, Delgado Bueno S, Bandrés Moyá F, Ramírez Iñiguez de la Torre MV y Capdevila García L. Valoración del dolor. revisión comparativa de escalas y cuestionarios. Rev Soc Esp Dolor 2018;25(4):228-236

La Escala Visual Analógica (EVA) permite medir la intensidad del dolor que describe el paciente con la máxima reproducibilidad entre los observadores. Consiste en una línea horizontal de 10 centímetros, en cuyos extremos se encuentran las expresiones extremas de un síntoma. En el izquierdo se ubica la ausencia o menor intensidad y en el derecho la mayor intensidad. Se pide al paciente que marque en la línea el punto que indique la intensidad y se mide con una regla milimetrada. La intensidad se expresa en centímetros o milímetros


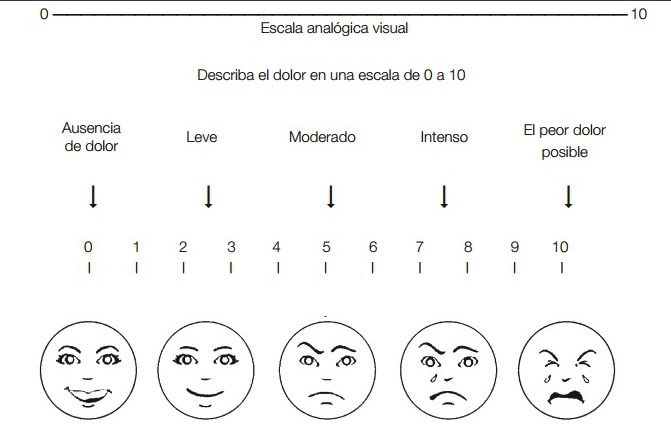


**Cuestionario Dolor Neuropático DN4**

D. Bouhassira, N. Attal, H. Alchaar, F. Boureau, B. Brochet, J. Bruxelle, et al. Comparison of pain syndromes associated with nervous or somatic lesions and development of a new neuropathic pain diagnostic questionnaire (DN4). Pain, 114 (2005), pp. 29-36 ttp://dx.doi.org/10.1016/j.pain.2004.12.010

Consta de siete ítems referidos a síntomas y tres referidos a la exploración. Una puntuación total de 4/10 o mayor sugiere dolor neuropático. Se ha validado en 15 idiomas, entre ellos el español.


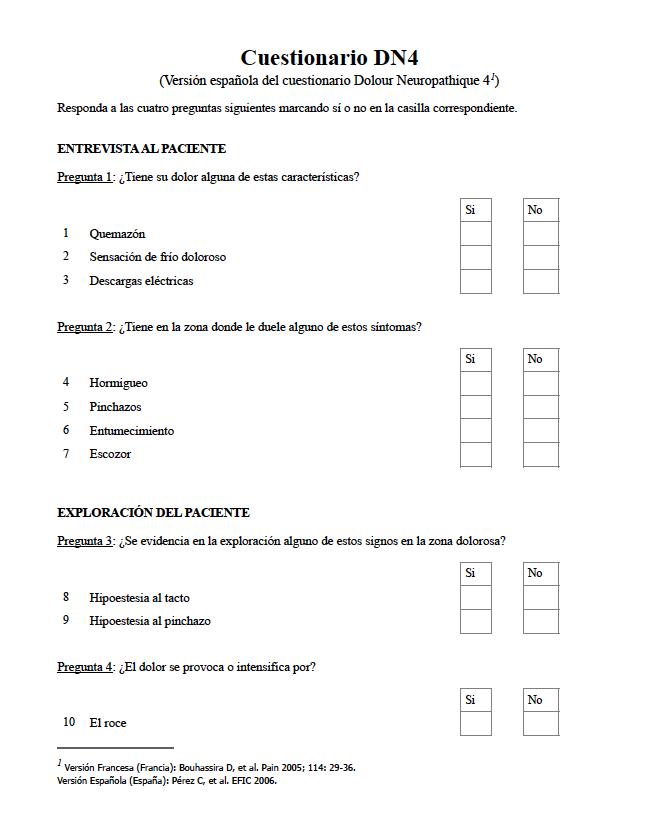


**Encuesta de satisfacción sobre la atención recibida en la consulta SPCI**

| FECHA:  Iniciales N.º Paciente: | **Nada satisfactorio** | **Poco satisfactorio** | **Adecuado** | **Satisfactorio** | **Muy satisfactorio** |
| --- | --- | --- | --- | --- | --- |
| Estado de las consultas |  |  |  |  |  |
| Tiempo hasta entrar en consulta |  |  |  |  |  |
| Solución dada a problemas |  |  |  |  |  |
| Confianza que transmite el personal |  |  |  |  |  |
| Amabilidad del personal |  |  |  |  |  |
| Preparación del personal |  |  |  |  |  |
| Interés del personal enfermería |  |  |  |  |  |
| Interés del personal médico |  |  |  |  |  |
| Satisfacción con cuidados sanitarios |  |  |  |  |  |
| Información recibida |  |  |  |  |  |
